# Supplementary material for: Synergizing urban smartness and resilience: An evaluation framework for coupling coordination and influencing factors
Source: Research Square preprint supplement (doi:10.21203/rs.3.rs-7282476/v1), 2025-10-07
Supplement: Supplementary file 1 [file 7d207174ed1ea6b5cf2889ed.docx]

Supplementary Material A. Method Details

**1. CRITIC-TOPSIS**

The Criteria Importance Through Intercriteria Correlation (CRITIC) approach is an objective weighting technique for determining indicator weights rooted in multi-indicator datasets (Diakoulaki et al., 1995). This technique accounts for both the standalone volatility of each metric and their systemic interdependencies, resulting in more objective and realistic weight assignments. Additionally, Similarly, Technique for Order of Preference by Similarity to Ideal Solution (TOPSIS) is a multicriteria decision-making framework which leverages variations within indicator datasets (Chen, 2021). It preserves the original information of the data while enabling precise and objective comparisons among evaluated entities. To improve the evaluation framework, the CRITIC and TOPSIS are combined to compute the score of UR and US. This integrated approach is further enhanced by incorporating a time dimension across different years, allowing for more accurate and comprehensive assessments. Let be the index of the city in the year , where , , , with denoting the overall counts of cities, years, and indicators. The detailed calculation steps are shown in **Figure S1**.


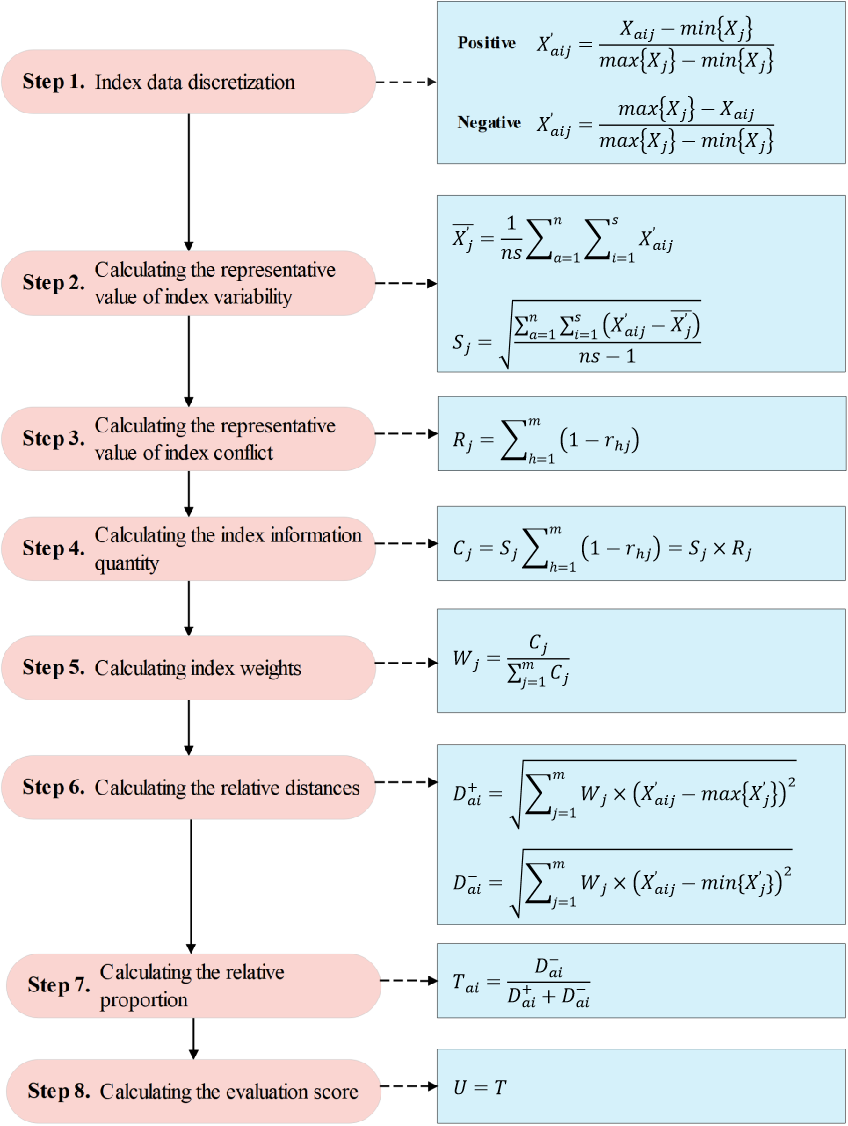


**Figure S1.** Calculation steps of the CRITIC-TOPSIS model.

**2. Coupling coordination degree**

To assess the coordinated development between UR and US, this study adopts the coupling coordination model. As outlined by (Li et al., 2012), the model includes two aspects: coupling degree, which quantifies the interaction strength among systems (Tomal, 2021), and coordination degree, which gauges the harmonization level in their development (Tian et al., 2020). A higher coupling degree implies more robust interactions, while a higher coordination degree indicates superior synchronization.

**3.3.1 Coupling degree calculation**

Previous research has demonstrated that conventional methods for computing coupling degree tend to produce clustered results, which significantly diminishes their reliability. To handle the limitation, this study adopts the improved approach developed by Wang et al. (2021). To optimize the calculation procedure and enhance the validness of the coupling degree, this analysis focuses on exploring the coupling relationship between UR and US. The formula is presented below:

.

**3.3.2 Coordination degree calculation**

The coordination degree is based on coupling degree calculations, with the detailed steps are outlined below:

First, calculate the UR and US system harmonic index using the following formula:

,

where represents the urban system harmonic index, with (UR score) and (urban smartification score) as key variables, and and as corresponding weighting coefficients. Considering the equal importance of UR and smartification, this study sets .

Second, calculate the UR and US system’s coordination degree applying the subsequent formula:

,

where represents the coordination degree, represents the coupling degree, and represents the harmonic index. Following the research framework of (Liu et al., 2020), this study categories the coordination degree into 10 types and 3 development stages, with the differences in coordination effects across stages listed in **Table S1**.

**Table S1.** Coordination types and stages.

| **Range of D value** | **Type** | **Stage** | **Features** |
| --- | --- | --- | --- |
|  | Extreme disorder | Disorder stage | Substantial disparities exist in the degrees of UR and US, leading to ineffective coordinated development of the urban system. |
|  | Serious disorder |
|  | Moderate disorder |
|  | Mild disorder |
|  | Verge of disorder | Transition stage | Notable discrepancies in UR and US remain apparent, with the urban system potentially gravitating toward either disequilibrium or harmonious development at any juncture. |
|  | Bare coordination |
|  | Primary coordination | Coordination stage | Minimal variations exist in the UR and US levels, enabling efficient coordination of the urban system. |
|  | Moderate coordination |
|  | High coordination |
|  | Excellent coordination |

**3. Relative development index**

Following Han et al.'s (2023) methodology, we utilize the relative development model to evaluate multi-systems’ relative developmental effects. The following formula calculates the relative development index (RDI):

,

where stands for the relative development index, denotes the resilience score and denotes US score. Three distinct phases emerge: indicates UR lag; shows synchronization; suggests US lag.

**4. Obstacle degree model**

The Obstacle Degree Model (ODM) serves as an analytical framework for identifying developmental constraints through three core components: factor contribution, indicator deviation, and obstacle magnitude. This methodology has gained widespread adoption for pinpointing critical factors influencing system coordination(Qu et al., 2024). The model's computational framework comprises:

,

,

where quantifies the obstacle degree for each indicator within the UR and US system, with representing total indicator count, represents each indicator's contribution to the UR and US system, denotes deviation degree reflecting the disparity between actual and ideal values and is standardized indicator values.

**5. Panel regression analysis**

Based on ODM analysis results, this study identifies crucial factors impacting system coordination. Following Huang et al.'s (2024) framework, we construct a panel data model to explore the mechanisms underlying coordinated development of UR and US. The baseline specification is expressed as:

,

where stands for the CCD of city in year ; denotes the constant, indicates the regression coefficient, is the influencing factors, and denotes the random error term.

Supplementary Material B. Basic information about the research area

**Table S2.** Basic information about the research area

| **City** | **Abbr.** | **Population (Ten thousand)** | **Administrative Area (km2 )** | **Per capita GDP (yuan)** | **Type of city** |
| --- | --- | --- | --- | --- | --- |
| Beijing | BJ | 2189 | 16411 | 87475 | megacity |
| Chengdu | CD | 1417.78 | 12121 | 57624 | megacity |
| Chongqing | CQ | 3209 | 82374 | 38914 | megacity |
| Guangzhou | GZ | 1283.89 | 7434 | 105909 | megacity |
| Shanghai | SH | 2488 | 6340 | 85373 | megacity |
| Shenzhen | SZ | 1195.85 | 1997 | 123247 | megacity |
| Tianjin | TJ | 1387 | 11760 | 93173 | megacity |
| Changsha | CS | 714.66 | 11816 | 89903 | supercity |
| Dalian | DL | 689.2 | 12574 | 102922 | supercity |
| Dongguan | DG | 829.23 | 2460 | 58804 | supercity |
| Foshan | FS | 726.18 | 3798 | 91259 | supercity |
| Hangzhou | HZ | 880.2 | 16571 | 88962 | supercity |
| Harbin | HB | 1064.2 | 53068 | 45810 | supercity |
| Jinan | JN | 694.96 | 8177 | 69444 | supercity |
| Kunming | KM | 860 | 21012 | 46256 | supercity |
| Nanjing | NJ | 816.1 | 6587 | 88525 | supercity |
| Qingdao | QD | 903.2 | 11282 | 82680 | supercity |
| Shenyang | SY | 822.8 | 12980 | 80480 | supercity |
| Wuhan | WH | 1012 | 8494 | 79482 | supercity |
| Xi'an | XA | 914 | 10108 | 51166 | supercity |
| Zhengzhou | ZZ | 903.1 | 7446 | 62054 | supercity |
| Changchun | CC | 910.42 | 20604 | 58691 | large city |
| Changzhou | CZ | 468.68 | 4372 | 85039 | large city |
| Fuzhou | FZ | 747 | 13066 | 58304 | large city |
| Guiyang | GY | 445.17 | 8034 | 38447 | large city |
| Hefei | HF | 757.2 | 11445 | 55186 | large city |
| Nanchang | NC | 513.2 | 7402 | 58715 | large city |
| Nanning | NN | 679.08 | 22244 | 35133 | large city |
| Ningbo | NB | 763.9 | 9816 | 86228 | large city |
| Shijiazhuang | SJZ | 1038.6 | 15848 | 43552 | large city |
| Suzhou | SU | 1054.91 | 8488 | 114029 | large city |
| Taiyuan | TY | 425.63 | 6977 | 54440 | large city |
| Urumqi | UR | 335 | 13788 | 59645 | large city |
| Wuxi | WX | 646.55 | 4627 | 117357 | large city |
| Xiamen | XM | 367 | 1573 | 77392 | large city |

Supplementary Material C. Results of panel regression model

**Table S3.** Results of panel regression model.

| **Variables** | **All** | | | **Supercity** | | |
| --- | --- | --- | --- | --- | --- | --- |
| **OLS** | **FE** | **FE_robust** | **OLS** | **FE** | **FE_robust** |
| InR1 | 0.00080** | 0.00266*** | 0.00266*** | 0.00232*** | 0.00248*** | 0.00248*** |
| log_SEn3 | 0.02102*** | 0.02799*** | 0.02799*** | 0.02579*** | 0.01647 | 0.01647 |
| log_SP2 | -0.01706*** | 0.04617** | 0.04617* | -0.04106*** | 0.04924 | 0.04924 |
| log_SG1 | 0.06768*** | 0.05531*** | 0.05531*** | 0.03497*** | 0.03272*** | 0.03272** |
| SR1 | 0.00069** | 0.00079** | 0.00079** | 0.00137*** | 0.00206*** | 0.00206** |
| SR2 | -0.11463*** | -0.45934*** | -0.45934*** | -0.21454*** | -0.42778*** | -0.42778*** |
| log_SEc2 | -0.00423** | -0.00288 | -0.00288 | -0.01905*** | -0.01661** | -0.01661* |
| log_SI2 | 0.02188*** | 0.02519*** | 0.02519*** | 0.00741 | 0.00577 | 0.00577 |
| log_SP1 | 0.00769*** | 0.00892** | 0.00892** | 0.02007*** | 0.01217*** | 0.01217*** |
| const | 0.12486*** | -0.25444*** | -0.25444*** | 0.48049*** | 0.18032 | 0.18032 |
| R-square | 0.7183 | 0.7518 | 0.7518 | 0.7766 | 0.6079 | 0.6079 |
| N | 442 | 442 | 442 | 91 | 91 | 91 |
| **Variables** | **Megacity** | | | **Large City** | | |
| **OLS** | **FE** | **FE_robust** | **OLS** | **FE** | **FE_robust** |
| InR1 | 0.00024 | 0.00335*** | 0.00335*** | -0.00003 | 0.00070 | 0.00070 |
| log_SEn3 | 0.01408** | 0.03823*** | 0.03823** | 0.02802** | 0.04659*** | 0.04659*** |
| log_SP2 | -0.00840 | -0.14604*** | -0.14604*** | -0.00718 | 0.15696*** | 0.15696*** |
| log_SG1 | 0.05891*** | 0.03593*** | 0.03593*** | 0.07518*** | 0.06870*** | 0.06870*** |
| SR1 | 0.00016 | 0.00157** | 0.00157*** | -0.00078 | 0.00072 | 0.00072 |
| SR2 | -0.14147 | 1.59966*** | 1.59966*** | 0.18713 | -2.21074*** | -2.21074*** |
| log_SEc2 | 0.00370 | 0.00533 | 0.00533 | -0.01082*** | -0.01290*** | -0.01290*** |
| log_SI2 | 0.03313*** | 0.06270*** | 0.06270*** | 0.02129*** | 0.01156 | 0.01156 |
| log_SP1 | 0.00110 | 0.02056*** | 0.02056*** | 0.00706 | 0.00326 | 0.00326 |
| const | 0.10147 | 0.09731 | 0.09731 | 0.07426 | -0.59328*** | -0.59328*** |
| R-square | 0.6527 | 0.8045 | 0.8045 | 0.7819 | 0.8786 | 0.8786 |
| N | 182 | 182 | 182 | 169 | 169 | 169 |
| ***, **, and * denote statistical significance at the 1%, 5%, and 10% levels | | | | | | |
